# Supplementary material for: Proteomics analysis reveals a dynamic diurnal pattern of photosynthesis-related pathways in maize leaves
Source: PLoS One. 2017 Jul 21;12(7):e0180670. doi: 10.1371/journal.pone.0180670 (PMC5521766; doi:10.1371/journal.pone.0180670)
Supplement: S2 Table — (XLSX) [file pone.0180670.s002.xlsx]

## Sheet: Sheet1
P48186-F	TTCGCTGGGAGTTTCGGG
P48186-R	ATCTGCTTCCAGTTCGACTTTC
P48183-F	TTGGTCGATTAATCTTCCAATATGCT
P48183-R	CATTACGTTCGTGCATTACCTCC
P04967-F	CCACTTATTTGATGGGATGGTTAAGAG
P04967-R	CACGGGCTTATCTCTCCAGC
B4G249-F	GCGAAACCAGCACGAACAG
B4G249-R	ACTGCGTCGATGAACTCCTC
B6SRL2-F	AGCAACTTGGTGGGGATGG
B6SRL2-R	GTTGCGGACCATGTAGGGAAG
B6TQ36-F	GGGATCCAAGTCAGGCGG
B6TQ36-R	CTTCATTGCTGCTCCAACTCC
O48900-F	AAGGCCTATTACCGGGACAATG
O48900-R	TTGACGAGCACGTCCTCATAC
P31927-F	CGCTGCCACATCATGTACTG
P31927-R	CTCTTGTAGCTTCCTGGGCTC
B5AMJ8-F	AATTTGTCCGCAGTGGTGTC
B5AMJ8-R	CATGAATCGTCCTATCGCTGC
B4FR89-F	AGTTTGCACACATGAACTTGACA
B4FR89-R	GAGATCTGCATTGCTGAGCTG
Q8L5G8-F	CTCCTCACATGACCTCAAAACTC
Q8L5G8-R	GTTCGTAGAGCCCACCGTC
B4G1J6-F	CGGTTCCGATAGCCCCAAG
B4G1J6-R	GACCCACTTCTTGAGGGTGC
P04711-F	ACAAATACGTGGAGACACAGCA
P04711-R	CAGCTTGACCAGTCCGGC
P00874-F	CGGCCTACTTCTTCACATTCAC
P00874-R	AAAAGATACCGCGAGAACGATC
B6STH5-F	CAGATTCTGTCGCTTCATTCAAC
B6STH5-R	CTCCCGTGGAAATGTGGCT
